# Supplementary material for: Study of thermodynamic, transport and volumetric properties of nanofluids containing ZrO 2 nanoparticles in polypropylene glycol, polyvinyl pyrrolidone and water
Source: Royal Society of Chemistry journal article supplement (doi:10.1039/d4ra05886k), 2024-01-01
Supplement: d4ra05886k1.pdf [file d4ra05886k1.pdf]

Supporting information

**Study of thermodynamic, transport and volumetric properties of  
nanofluids containing ZrO<sub>2</sub> nanoparticles in polypropylene glycol,  
polyvinyl pyrrolidone and water**

Nasrin Jebreili, Elaheh Janbezar, Mohammad Taghi Zafarani, Hemayat Shekaari<sup>1</sup>, Behrang Golmohammadi

*Department of Physical Chemistry, Faculty of Chemistry, University of Tabriz, Tabriz,  
5166616471, Iran*

---

<sup>1</sup> Correspond Author  
Email: [hemayatt@yahoo.com](mailto:hemayatt@yahoo.com)  
Tell: +984133393094  
Fax: 984133340191

**Table S1.** Types of fluids including H<sub>2</sub>O-PPG.

| Base fluid types | $x_2^{\text{base fluid a}}$ |
|------------------|-----------------------------|
| 4:1              | 0.252                       |
| 3:1              | 0.174                       |

<sup>a</sup>  $x_2^{\text{base fluid}}$ : mole fraction of PPG in PPG-H<sub>2</sub>O aqueous solution.

**Table S2.** Types of fluids including H2O-PVP.

| Base fluid types        | $10^5 \cdot x_2^{\text{base fluid } a}$ |
|-------------------------|-----------------------------------------|
| H <sub>2</sub> O-PVP 2% | 0.776                                   |
| H <sub>2</sub> O-PVP5%  | 1.898                                   |
| H <sub>2</sub> O-PVP10% | 4.013                                   |
| H <sub>2</sub> O-PVP20% | 6.209                                   |
| H <sub>2</sub> O-PVP30% | 15.533                                  |

<sup>a</sup>  $x_2^{\text{base fluid}}$ : mole fraction of PVP in PVP-H2O aqueous solution.

**TableS3.** Standard deviations ( $\sigma$ ) resulting from fitting the excess molar volume ( $V_m^E$ ) values in equations (3), (4) and (5) for the  $ZrO_2$ -PPG and  $ZrO_2$ -H<sub>2</sub>O-PVP with temperature dependency at different temperatures.

|                                                                | Ott et al. |          | Redlich-Kister |          | Polynomial |          |
|----------------------------------------------------------------|------------|----------|----------------|----------|------------|----------|
|                                                                | Method 1   | Method 2 | Method 1       | Method 2 | Method 1   | Method 2 |
| <b>ZrO<sub>2</sub>-PPG</b>                                     |            |          |                |          |            |          |
| $T = 293.15$ K                                                 |            |          |                |          |            |          |
| $10^2 \cdot \sigma(V_m^E / (cm^3 \cdot mol^{-1}))$             | 18.1       | 2.2      | 52.2           | 1.5      | 25.7       | 0.7      |
| $10^4 \cdot \sigma(d / g \cdot cm^{-3})$                       | 6.6        | 4.9      | 6.8            | 5.1      | 6.5        | 4.9      |
| $T = 298.15$ K                                                 |            |          |                |          |            |          |
| $10^2 \cdot \sigma(V_m^E / (cm^3 \cdot mol^{-1}))$             | 18.2       | 3.2      | 49.0           | 1.0      | 27.8       | 0.2      |
| $10^4 \cdot \sigma(d / g \cdot cm^{-3})$                       | 10.6       | 8.3      | 10.8           | 8.1      | 10.6       | 7.9      |
| $T = 308.15$ K                                                 |            |          |                |          |            |          |
| $10^2 \cdot \sigma(V_m^E / (cm^3 \cdot mol^{-1}))$             | 24.4       | 2.6      | 41.8           | 0.9      | 36.5       | 1.8      |
| $10^4 \cdot \sigma(d / g \cdot cm^{-3})$                       | 17.9       | 14.0     | 18.1           | 13.6     | 17.9       | 13.4     |
| $T = 318.15$ K                                                 |            |          |                |          |            |          |
| $10^2 \cdot \sigma(V_m^E / (cm^3 \cdot mol^{-1}))$             | 19.8       | 3.0      | 56.8           | 2.0      | 34.5       | 1.0      |
| $10^4 \cdot \sigma(d / g \cdot cm^{-3})$                       | 9.0        | 7.1      | 9.1            | 7.3      | 9.0        | 7.2      |
| Overall ( $10^2 \cdot \sigma(V_m^E / (cm^3 \cdot mol^{-1}))$ ) | 20.1       | 2.7      | 49.9           | 1.3      | 31.1       | 0.9      |
| Overall ( $10^4 \cdot \sigma(d / g \cdot cm^{-3})$ )           | 11.0       | 8.6      | 11.2           | 8.5      | 11.0       | 8.3      |
| <b>ZrO<sub>2</sub>-H<sub>2</sub>O-PVP</b>                      |            |          |                |          |            |          |
| $T = 293.15$ K                                                 |            |          |                |          |            |          |
| $10^4 \cdot \sigma(V_m^E / (cm^3 \cdot mol^{-1}))$             | 4.4        | 1.4      | 17.5           | 1.4      | 15.9       | 1.2      |
| $10^4 \cdot \sigma(d / g \cdot cm^{-3})$                       | 1.0        | 0.8      | 1.0            | 0.9      | 1.0        | 0.8      |
| $T = 298.15$ K                                                 |            |          |                |          |            |          |
| $10^4 \cdot \sigma(V_m^E / (cm^3 \cdot mol^{-1}))$             | 4.4        | 1.5      | 10.0           | 2.6      | 8.5        | 1.2      |
| $10^4 \cdot \sigma(d / g \cdot cm^{-3})$                       | 1.4        | 1.2      | 1.4            | 1.3      | 1.4        | 1.2      |
| $T = 308.15$ K                                                 |            |          |                |          |            |          |
| $10^4 \cdot \sigma(V_m^E / (cm^3 \cdot mol^{-1}))$             | 1.9        | 1.0      | 13.0           | 2.4      | 11.5       | 0.7      |
| $10^4 \cdot \sigma(d / g \cdot cm^{-3})$                       | 1.9        | 1.6      | 1.9            | 1.6      | 1.9        | 1.6      |
| $T = 318.15$ K                                                 |            |          |                |          |            |          |
| $10^4 \cdot \sigma(V_m^E / (cm^3 \cdot mol^{-1}))$             | 3.5        | 1.2      | 16.4           | 2.2      | 14.9       | 0.8      |
| $10^4 \cdot \sigma(d / g \cdot cm^{-3})$                       | 2.3        | 1.9      | 2.3            | 2.0      | 2.3        | 1.9      |
| Overall ( $10^4 \cdot \sigma(V_m^E / (cm^3 \cdot mol^{-1}))$ ) | 3.5        | 1.2      | 14.2           | 2.1      | 12.7       | 0.9      |
| Overall ( $10^4 \cdot \sigma(d / g \cdot cm^{-3})$ )           | 1.6        | 1.3      | 1.6            | 1.4      | 1.6        | 1.3      |

**TableS4.** Excess molar volume ( $V_m^E$ ) parameters of the polynomial equation (5) with temperature dependency using the second fitting method for ZrO<sub>2</sub>-PPG and ZrO<sub>2</sub>-H<sub>2</sub>O-PVP systems.

| <b>ZrO<sub>2</sub>-PPG</b>                    |          |               |               |               |               |            |               |
|-----------------------------------------------|----------|---------------|---------------|---------------|---------------|------------|---------------|
|                                               | $A_0$    | $10^{-4}.A_1$ | $A_2$         | $A_3$         | $10^{-4}.A_4$ | $10^3.A_5$ | $\sigma$      |
| $10^6.V_m^E / (m^3.mol^{-1})$                 | -284.203 | 8.361         | -176.936      | 0.4           | -2.862        | 6          | 0.022         |
| <b>ZrO<sub>2</sub>-H<sub>2</sub>O-PVP 30%</b> |          |               |               |               |               |            |               |
|                                               | $B_0$    | $10^{-3}.B_1$ | $10^{-5}.B_2$ | $10^{-7}.B_3$ | $B_4$         | $B_5$      | $10^4.\sigma$ |
| $10^6.V_m^E / (m^3.mol^{-1})$                 | -26.574  | 6.032         | -1.053        | 3.718         | 558.06        | 0.661      | 2.119         |

**TableS5.** Excess molar volume ( $V_m^E$ ) parameters of the Redlich–Kister (3) temperature-dependent equation using the first fitting method for  $ZrO_2$ -PPG and  $ZrO_2$ -H<sub>2</sub>O-PVP systems.

| <b>ZrO<sub>2</sub>-PPG</b>                    |               |               |               |               |               |               |               |
|-----------------------------------------------|---------------|---------------|---------------|---------------|---------------|---------------|---------------|
|                                               | $10^{-5}.A_0$ | $10^{-7}.A_1$ | $10^{-5}.A_2$ | $10^{-6}.A_3$ | $10^{-5}.A_4$ | $10^{-7}.A_5$ | $\sigma$      |
| $10^6.V_m^E / (m^3.mol^{-1})$                 | -1.007        | -1.104        | -2.774        | -1.386        | -1.798        | 1.056         | 1.005         |
| <b>ZrO<sub>2</sub>-H<sub>2</sub>O-PVP 30%</b> |               |               |               |               |               |               |               |
|                                               | $10^{-4}.B_0$ | $10^{-4}.B_1$ | $10^{-5}.B_2$ | $10^{-4}.B_3$ | $10^{-4}.B_4$ | $10^{-4}.B_5$ | $10^4.\sigma$ |
| $10^6.V_m^E / (m^3.mol^{-1})$                 | 3.9           | 2.195         | 100.895       | -2.143        | -3.917        | 2.09          | 29.14         |

**TableS6.** Excess molar volume ( $V_m^E$ ) parameters of the Ott et al equation (4) temperature-dependent equation using the first fitting method for ZrO<sub>2</sub>-PPG and ZrO<sub>2</sub>-H<sub>2</sub>O-PVP systems.

| <b>ZrO<sub>2</sub>-PPG</b>                    |                     |       |                     |                     |                     |                     |                     |                     |         |                     |                        |                        |                     |
|-----------------------------------------------|---------------------|-------|---------------------|---------------------|---------------------|---------------------|---------------------|---------------------|---------|---------------------|------------------------|------------------------|---------------------|
|                                               | $A_0$               | $A_1$ | $A_2$               | $A_3$               | $A_4$               | $A_5$               | $10^{-4} \cdot A_6$ | $A_7$               | $A_8$   | $10^{-7} \cdot A_9$ | $10^{-4} \cdot A_{10}$ | $10^{-7} \cdot A_{11}$ | $\sigma$            |
| $10^6 \cdot V_m^E / (m^3 \cdot mol^{-1})$     | 504.486             | 10.9  | -562.522            | 2.995               | 108.856             | 2.715               | 3.269               | 625.36              | -1.476  | -2.031              | -3.565                 | 2.119                  | 0.406               |
| <b>ZrO<sub>2</sub>-H<sub>2</sub>O-PVP 30%</b> |                     |       |                     |                     |                     |                     |                     |                     |         |                     |                        |                        |                     |
|                                               | $10^{-3} \cdot B_0$ | $B_1$ | $10^{-3} \cdot B_2$ | $10^{-3} \cdot B_3$ | $10^{-3} \cdot B_4$ | $10^{-3} \cdot B_5$ | $10^{-3} \cdot B_6$ | $10^{-4} \cdot B_7$ | $B_8$   | $10^{-4} \cdot B_9$ | $10^{-3} \cdot B_{10}$ | $10^{-4} \cdot B_{11}$ | $10^4 \cdot \sigma$ |
| $10^6 \cdot V_m^E / (m^3 \cdot mol^{-1})$     | 6.329               | 81.15 | 2.071               | 3.605               | -2.18               | 3.57                | 7.434               | 2.141               | -23.492 | 2.125               | -7.623                 | 2.109                  | 7.52                |

**TableS7.** Excess molar volume ( $V_m^E$ ) parameters of the polynomial equation (5) temperature-dependent equation using the first fitting method for ZrO<sub>2</sub>-PPG and ZrO<sub>2</sub>-H<sub>2</sub>O-PVP systems.

| <b>ZrO<sub>2</sub>-PPG</b>                    |               |               |               |               |               |         |               |
|-----------------------------------------------|---------------|---------------|---------------|---------------|---------------|---------|---------------|
|                                               | $10^{-3}.A_0$ | $10^{-7}.A_1$ | $A_2$         | $10^{-7}.A_3$ | $10^{-5}.A_4$ | $A_5$   | $\sigma$      |
| $10^6.V_m^E / (m^3.mol^{-1})$                 | -2.959        | 4.193         | 0.11          | -4.107        | 1.383         | -72.946 | 0.629         |
| <b>ZrO<sub>2</sub>-H<sub>2</sub>O-PVP 30%</b> |               |               |               |               |               |         |               |
|                                               | $10^{-4}.B_0$ | $10^{-4}.B_1$ | $10^{-4}.B_2$ | $10^{-4}.B_3$ | $10^{-5}.B_4$ | $B_5$   | $10^4.\sigma$ |
| $10^6.V_m^E / (m^3.mol^{-1})$                 | -2.619        | 3.179         | 2.592         | 3.245         | 1.303         | 175.638 | 26.157        |



**TableS8.** Excess molar volume ( $V_m^E$ ) parameters of the Redlich–Kister (3) temperature-dependent equation using the second fitting method for ZrO<sub>2</sub>-PPG and ZrO<sub>2</sub>-H<sub>2</sub>O-PVP systems.

| <b>ZrO<sub>2</sub>-PPG</b>                    |               |               |               |               |               |               |               |
|-----------------------------------------------|---------------|---------------|---------------|---------------|---------------|---------------|---------------|
|                                               | $10^{-3}.A_0$ | $10^{-4}.A_1$ | $10^{-4}.A_2$ | $10^{-5}.A_3$ | $10^{-3}.A_4$ | $10^{-4}.A_5$ | $\sigma$      |
| $10^6.V_m^E / (m^3.mol^{-1})$                 | -7.136        | -3.656        | -1.381        | -1.814        | -6.961        | -6.01         | 0.028         |
| <b>ZrO<sub>2</sub>-H<sub>2</sub>O-PVP 30%</b> |               |               |               |               |               |               |               |
|                                               | $10^{-3}.B_0$ | $10^{-4}.B_1$ | $10^{-5}.B_2$ | $10^{-5}.B_3$ | $10^{-3}.B_4$ | $10^{-4}.B_5$ | $10^4.\sigma$ |
| $10^6.V_m^E / (m^3.mol^{-1})$                 | 4.186         | 1.371         | -2.082        | -1.816        | -4.237        | 1.35          | 4.44          |

**TableS9.** Excess molar volume ( $V_m^E$ ) parameters of the Ott et al equation (4) temperature-dependent equation using the second fitting method for ZrO<sub>2</sub>-PPG and ZrO<sub>2</sub>-H<sub>2</sub>O-PVP systems.

| <b>ZrO<sub>2</sub>-PPG</b>                    |               |               |            |         |            |         |            |               |            |         |                  |          |               |
|-----------------------------------------------|---------------|---------------|------------|---------|------------|---------|------------|---------------|------------|---------|------------------|----------|---------------|
|                                               | $A_0$         | $10^{-3}.A_1$ | $A_2$      | $A_3$   | $A_4$      | $A_5$   | $A_6$      | $A_7$         | $A_8$      | $A_9$   | $10^{-3}.A_{10}$ | $A_{11}$ | $\sigma$      |
| $10^6.V_m^E / (m^3.mol^{-1})$                 | -20.936       | 5.629         | 998.645    | 231.159 | -291.156   | 210.331 | 998.647    | 231.158       | -291.139   | 210.322 | -1.617           | 190.106  | 0.056         |
| <b>ZrO<sub>2</sub>-H<sub>2</sub>O-PVP 30%</b> |               |               |            |         |            |         |            |               |            |         |                  |          |               |
|                                               | $10^{-3}.B_0$ | $B_1$         | $10^3.B_2$ | $B_3$   | $10^3.B_4$ | $B_5$   | $10^3.B_6$ | $10^{-4}.B_7$ | $10^3.B_8$ | $B_9$   | $10^3.B_{10}$    | $B_{11}$ | $10^4.\sigma$ |
| $10^6.V_m^E / (m^3.mol^{-1})$                 | -16.064       | 0.049         | -6.524     | 1.314   | -6.057     | 1.316   | -6.528     | 1.314         | -6.061     | 1.316   | -1.937           | 1.315    | 2.71          |

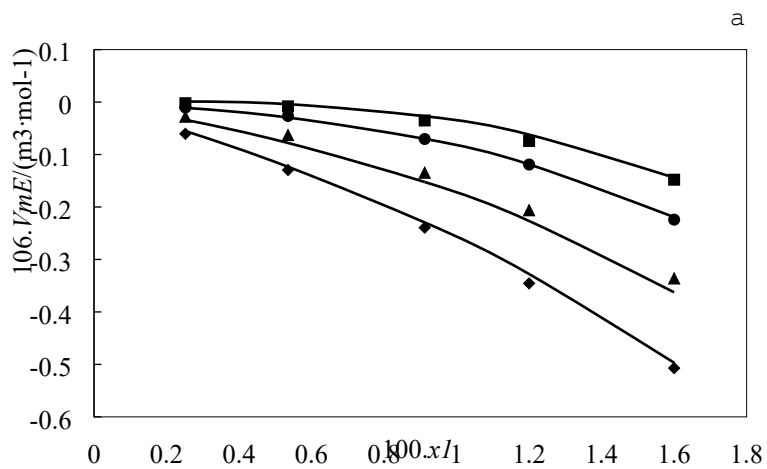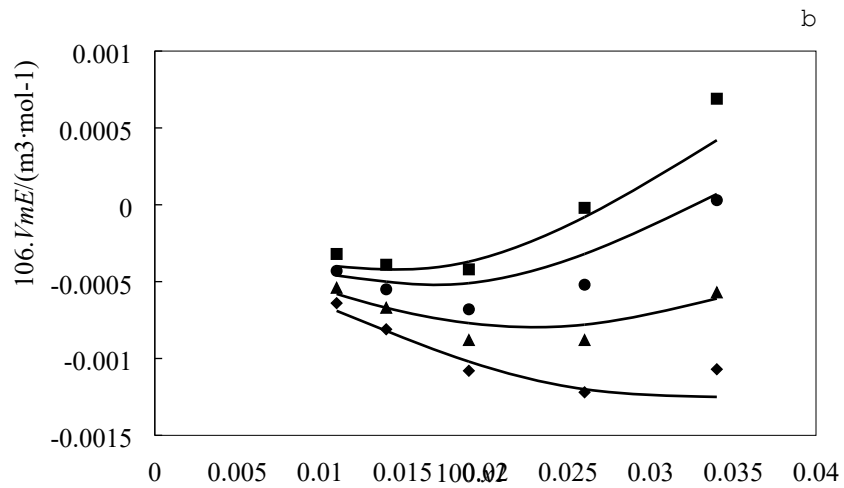

**Figure (S1):** The excess molar volume obtained from fitting the data in the temperature-dependent equation using the second fitting method in terms of nanoparticle molar fraction for the system (a)  $\text{ZrO}_2\text{-PPG}$  and (b)  $\text{ZrO}_2\text{-H}_2\text{O-PVP}$  at  $T = (293.15(\blacksquare), 298.15(\bullet), 308.15(\blacktriangle), 318.15(\blacklozenge))$  K compared to (—) polynomial equation with temperature dependency.
